# Supplementary material for: Phase matrix characterization of long-range transported Saharan dust using multiwavelength polarized polar imaging nephelometry
Source: Copernicus journal article supplement (doi:10.5194/egusphere-2024-2080), 2024-08-14
Supplement: Supplementary file 1 [file egusphere-2024-2080-supplement.pdf]

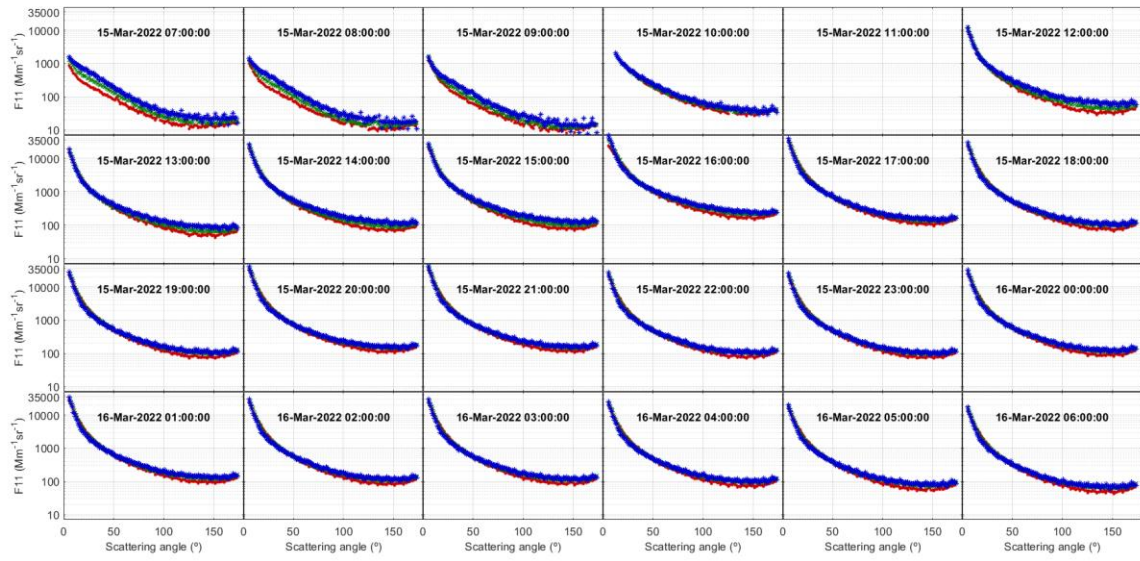

Figure S1. Temporal evolution of the 60-minute average of  $F_{11}$  during the dust event on March 15<sup>th</sup> - 16<sup>th</sup>.

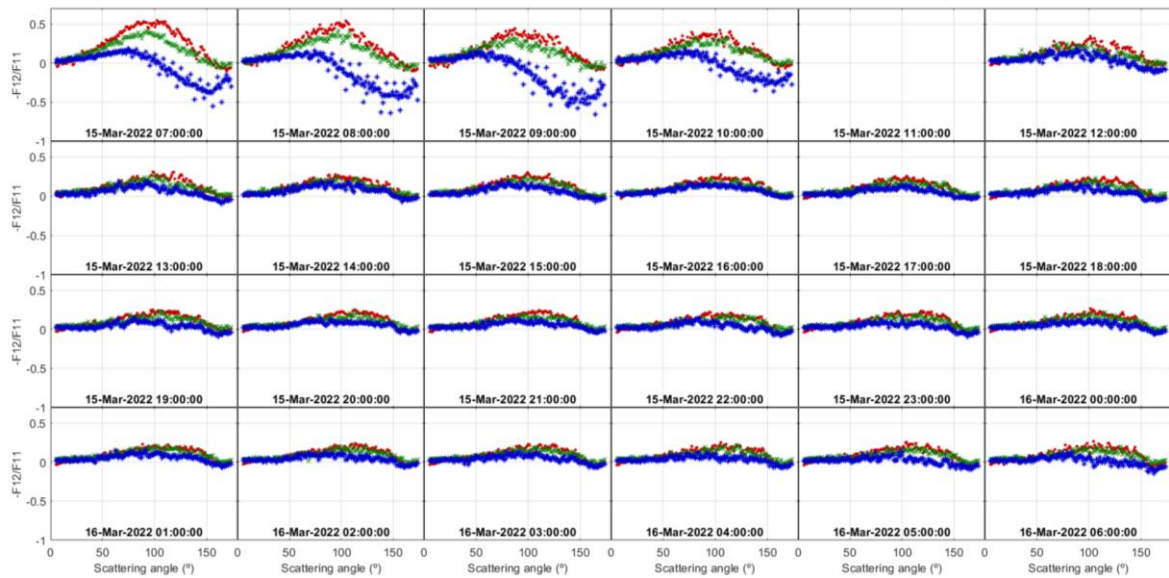

Figure S2. Temporal evolution of the 60-minute average of  $-F_{12}/F_{11}$  during the dust event on March 15<sup>th</sup> - 16<sup>th</sup>.

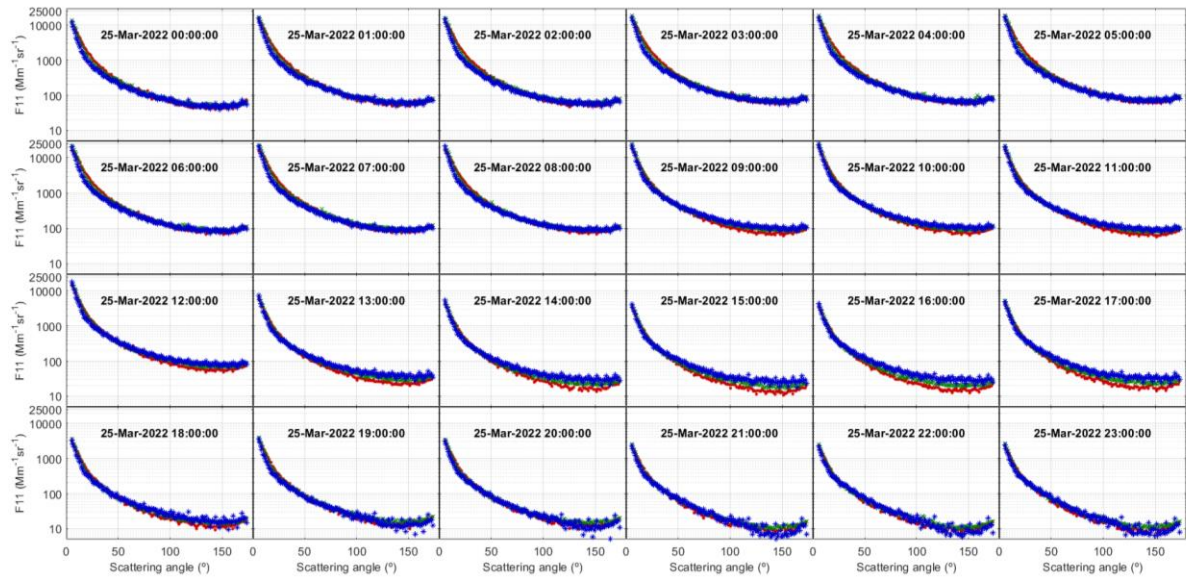

Figure S3. Temporal evolution of the 60-minute average of  $F_{11}$  during the dust event on March 24<sup>th</sup> - 25<sup>th</sup>.

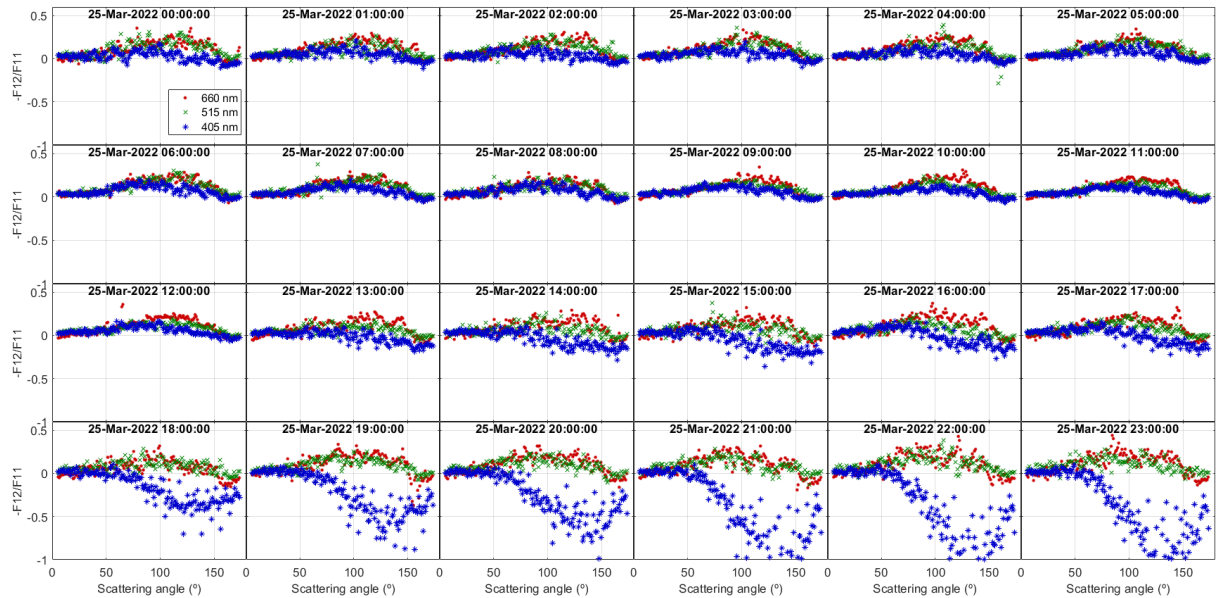

Figure S4. Temporal evolution of the 60-minute average of  $-F_{12}/F_{11}$  during the dust event on March 24<sup>th</sup> - 25<sup>th</sup>.
